# Supplementary material for: Early onset X‐linked female limited high myopia in three multigenerational families caused by novel mutations in the ARR3 gene
Source: PubMed Central journal article supplement (PMC9303208; doi:10.1002/humu.24327), 2022-01-19
Supplement: HUMU-43-380-s001.pdf [file HUMU-43-380-s001.pdf]

Supplementary figures

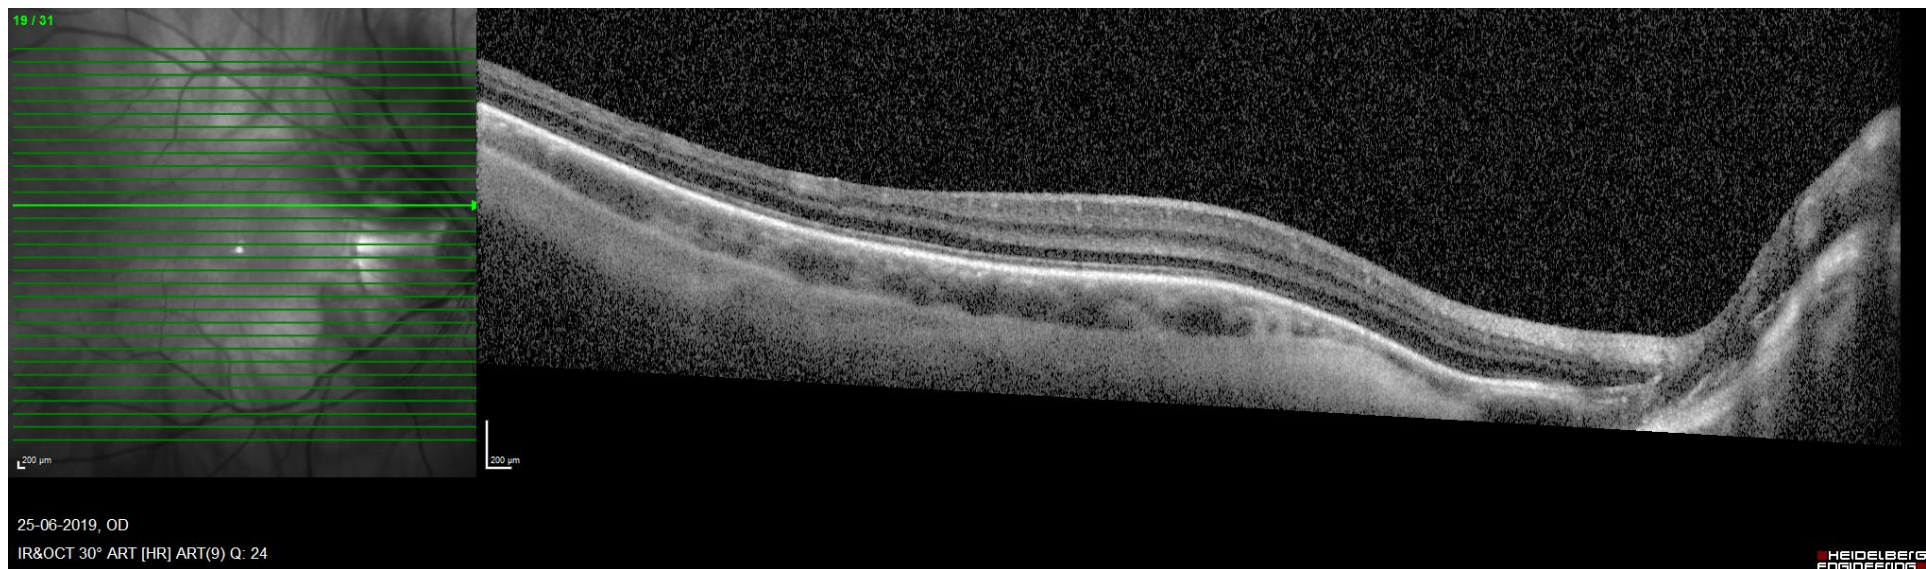

**Supplemental Figure 1:** OCT image of staphyloma of the proband of Family III.
